# Supplementary material for: A clue on bee glue: New insight into the sources and factors driving resin intake in honeybees (Apis mellifera)
Source: PLoS One. 2019 Feb 6;14(2):e0210594. doi: 10.1371/journal.pone.0210594 (PMC6364881; doi:10.1371/journal.pone.0210594)
Supplement: S2 Table — (XLSX) [file pone.0210594.s004.xlsx]

## Sheet: S2_table
Table S2: List of substance classes and the mean values of relative amounts [%] of all components identified from resin samples of tree buds, returning honeybee (Apis mellifera) foragers and propolis.
Nb	Substance class	Compound	RT	KI	Pinus [H]		Picea [H]		Alnus [A]		Aesculus [H]		Populus [Px3]		Populus [Px1]		Populus [Px2]		Populus [Pb]		Populus [Pt]		Betula [B2]		Betula [B1]		Orange		Red		Yellow	Ocher		Brown		Clear		Whitish	Propolis
					mean	SD	mean	SD	mean	SD	mean	SD	mean	SD	mean	SD	mean	SD	mean	SD	mean	SD	mean	SD	mean	SD	mean	SD	mean	SD	mean	mean	SD	mean	SD	mean	SD	mean	mean	SD
1	MT		4.183		0.145531	0.031411	0.0528441	0																							0.388815							0.161159
2	MT	alpha-Pinene	4.236	932	3.18278	1.46256	3.97281	2.2283					0.157162	0.0478281	0.154602	0															6.07576							48.1387
3	Acid/ester	Hexanoic acid	4.881	967											0.314135	0											0.222025	0			1.6309
4	MT	beta-Pinene	4.978	974			1.9867	1.13298					0.244733	0.0984057																	0.541978							6.91491
5	MT		4.987		0.503704	0.243495	0.168357	0.0076836																														0.889428
6	MT	beta-Pinene	5.077	974	0.491069	0.200974	6.163	0.0885867					0.160937	0.0528586																	6.18137							1.21566
7	MT	beta-Myrcene	5.276	988	3.39365	0.981282	2.34022	0					0.0738525	0.0252444																	1.58025							0.593717
8	MT	3-Carene	5.737	1008	13.8846	3.26848	1.25275	0.034972																							12.4906							11.2741
9	MT		6.07				0.0726428	0.00114943																														0.463863
10	MT	D-Limonene	6.188	1031			0.241512	0.0034356																							14.4785							0.311864
11	MT	beta-Phellandrene	6.23	1025			0.489484	0.101719													0.224078	0																0.425847
12	MT	Eucalyptol	6.241	1033	0.286017	0.231492							2.25441	0.638125							0.34805	0					0.675163	0				0.611482	0.505249
13	Phenole	Benzyl alcohol	6.258	1026											1.0079	0.936398			0.34805	0							0.984382	0.385728	0.150737	0									0.436947	0
14	MT	trans-beta-Ocimene	6.558	1044	0.178655	0							0.482567	0.202581	0.40892	0.128113
15	MT	gamma-Terpinene	6.869	1054	0.0889673	0.0170165							0.131494	0.0478503					0.224078	0
16	Alcohol/aldehyde/ketone	Acetophenone	6.93	1059											0.145631	0
17	MT	Terpinolene	7.541	1086	0.821733	0.163776	0.0707824	0.0140417																								1.07879	1.07286					0.377249
18	Phenole		7.684																													5.04006	0					0.172865
19	MT	beta-Linalool	7.898	1095									0.0590906	0	0.128248	0.0282476											0.381857	0				0.252141	0
20	Aliphatic compound	Undecane	7.946	1100
21	Alcohol/aldehyde/ketone		8.16										0.0804629	0.0233865	0.607201	0.515959											4.00443	0	0.108312	0
22	Unknown		8.168																																			0.154134
23	Unknown		8.224								0.11734	0																								0.0404025	0
24	Alcohol/aldehyde/ketone		8.45												0.412115	0											0.213449	0
25	MT	alpha-Campholene aldehyd	8.513	1125																																		0.101488
26	MT	Sabinol	8.901	1137			0.168651	0.032352																														0.244988
27	MT	trans-Verbenol	8.997	1140			0.104907	0.0238082																														0.64362
28	MT		9.182												0.0946922	0.00992017
29	Phenole		9.398												0.602841	0.0936697
30	Terpenoid		9.545																																			0.123596
31	Alcohol/aldehyde/ketone		9.572						1.11775	0.289125											0.539336	0.745236										29.6439	12.5093
32	Benzoic acid/ester	Benzoic acid	9.69	1171											3.10678	2.87283	0.115764	0	0.539336	0.745236							13.2409	8.06771	0.267197	0									3.09916	3.10202
33	Terpenoid		9.816																																			0.100209
34	MT	Terpinen-4-ol	9.994	1174			0.0500914	0					0.153789	0.0904948													0.11868	0
35	Phenole		10.004		0.106353	0	0.0550457	0																														0.222211
36	Phenole		10.176		0.0944945	0.00936596	0.0556738	0																								0.870603	0.388735					0.102645
37	Benzoic acid/ester	Methyl salicylate	10.184	1190											0.605796	0.337031													0.191005	0.038594									0.957686	0
38	MT	L-alpha-Terpineol	10.23	1186			0.0719498	0																														0.319162
39	MT		10.385				0.192992	0.0698486					0.528259	0.210259																		0.149525	0.0410192					0.428871
40	Terpenoid	Estragole	10.427	1195			0.188098	0.030955																								0.710366	0.420649
41	Aliphatic compound	Dodecane	10.598	1200											0.138795	0																				0.179968	0.105692		1.76341	0
42	Terpenoid		10.698																						0.0508303	0						0.116496	0	0.0779278	0.0341601
43	Phenole	2,3-dihydro-Benzofuran	10.85	1219																									0.0691291	0									1.49594	1.05091
44	Benzoic acid/ester		10.937						0.108055	0																													0.520507	0.390603
45	Alcohol/aldehyde/ketone		11.013												0.195017	0.0412689													0.195847	0.0661571		0.316488	0.190097
46	Acid/ester		11.648										0.714371	0.259774	0.255139	0			0.00791098	0
47	MT	Geraniol	11.84	1249											0.352102	0.0777968
48	Acid/ester		11.847												0.130751	0.0110916
49	Alcohol/aldehyde/ketone		11.988						0.376554	0.133182											0.319041	0
50	Aliphatic compound		12.404																0.319041	0
51	Acid/ester		12.626						0.0919786	0.0392551
52	Acid/ester	Bornyl acetate	12.784	1282	0.142601	0.0116112	0.08782	0.0579629																												0.0907139	0	0.106267
53	MT	Thymol	12.929	1289																																		0.112988	3.48152	1.69707
54	Terpenoid		13.087						0.459336	0.119431											0.385084	0
55	Alcohol/aldehyde/ketone		13.093																0.385084	0	0.132068	0.168819										0.347979	0.190317			0.0423733	0
56	Aliphatic compound	Tridecane	13.233	1300					0.161975	0.0841639					0.212886	0.0600974			0.132068	0.168819	0.165895	0.152295					0.39839	0.211596	0.128259	0.0505948	0.590188	0.653961	0.58693	0.0622836	0
57	Benzoic acid/ester		13.32												0.267931	0.134374	0.684429	0	0.165895	0.152295							1.49203	0											1.07224	1.7885
58	Acid/ester		13.418						0.56425	0.169367											0.351369	0
59	Terpenoid		13.434																													1.0463	0.863125					0.129921
60	Alcohol/aldehyde/ketone		13.536																0.351369	0	0.364632	0
61	Aliphatic compound		13.655																0.364632	0
62	Acid/ester		13.746										0.0779514	0	0.134389	0											0.366288	0.0614004
63	Phenole		13.834																										0.531412	0.12659
64	Phenole		13.885
65	Benzoic acid/ester		13.933												0.14503	0																							0.315278	0
66	Acid/ester		13.974										0.103932	0.0094503
67	Phenylpropanoid		13.982																										0.33669	0
68	Benzoic acid/ester		14.021												0.253347	0.0182349													0.562619	0
69	ST	gamma-Elemene	14.04	1335					0.288016	0.0283693
70	Terpenoid		14.067		0.101913	0.0148961																										0.456382	0.0830282
71	Benzoic acid/ester		14.233																													0.144203	0.0367858
72	Benzoic acid/ester		14.242																										0.274117	0.131145
73	ST		14.413		0.259336	0.0291338	0.15426	0													0.625634	0										0.117415	0
74	ST	alpha-Cubebene	14.42	1345					0.0797875	0.0234163					0.110389	0.00443178			0.625634	0			0.0795321	0								0.46013	0.22362
75	Phenylpropanoid	Eugenol	14.511	1356									0.153016	0	0.0752994	0																							0.14877	0
76	Phenolic acid/ester		14.523				0.066435	0																					0.112038	0		0.514153	0.297671
77	Phenylpropanoid		14.581																													0.224225	0
78	Phenylpropanoid		14.952												0.356669	0					0.132206	0									0.324142
79	ST	alpha-Ylangene	14.977	1373									0.352533	0.216872	0.148541	0.0180248			0.132206	0	1.63705	0	0.121787	0			0.970322	0	0.0770049	0		0.405702	0.272896
80	ST	Copaene	15.161	1376					0.193082	0.0617112					1.04634	0.445526	0.238052	0	1.63705	0			0.577424	0.221864			0.127354	0.0531951				0.0949554	0.0211625	0.043753	0.00790798
81	Aliphatic compound		15.192						0.124842	0											0.0503926	0					0.0548137	0
82	ST	beta-Bourbonene	15.248	1384	0.169416	0.0178847	0.0512586	0	0.143544	0.0344632									0.0503926	0			0.0702924	0.00238679								0.286817	0					0.150398
83	ST		15.353
84	ST		15.462										0.0676952	0							0.430439	0					0.124859	0.0493083
85	ST		15.492						0.107471	0.035924					0.0658778	0.0149692			0.430439	0			0.101392	0								0.131658	0.0598698
86	ST		15.504						0.320252	0.111239			0.117904	0.0266071									0.107184	0.0655233										0.0574057	0
87	ST	Sibirene	15.582	1400			0.0768906	0.0234671													0.151938	0										0.564134	0.568489
88	Phenole	4-Hydroxy-3-methoxybenzaldehyde (Vanillin)	15.594	1393															0.151938	0	0.0237268	0.00264291									0.331239	0.80592	0.967203						0.17361	0.0458984
89	Aliphatic compound	Tetradecane	15.84	1400	0.119869	0.0228691			0.276089	0.178493			0.11846	0	0.321375	0.208628			0.0237268	0.00264291			0.05801	0			0.786728	0.487056	0.19382	0.0930334	1.18668			0.0648329	0.0359005
90	ST		15.919				0.185479	0																								4.58025	0
91	ST	Caryophyllene	15.926	1408																					0.105784	0.0248101								0.0908443	0.0673939
92	ST	alpha-Bergamotene	16.027	1411													0.60614	0			0.651703	0					0.471941	0				0.149303	0
93	ST	Longifolene	16.032	1407	0.138364	0	0.420928	0.36186																								0.13264	0.0697626
94	Alcohol/aldehyde/ketone		16.089								1.89079	2.36947							0.00787708	0.000349534	0.225367	0														0.724625	0.129115
95	ST	beta-Ylangene	16.152	1419					1.50371	0.746743					0.133462	0.02178			0.225367	0	0.0682907	0.0581864	0.170576	0.105994								6.24696	5.47485
96	ST	Caryophyllene <E>	16.265	1417	0.371854	0.0827321	0.242841	0.0342679					1.05355	0.18031	0.161437	0.0717228	2.70036	1.02865	0.0682907	0.0581864			0.247715	0.15468	0.690127	0.25789	3.08777	4.50413						0.803312	0.735921				0.165183	0
97	ST		16.368																															0.0995858	0.0202212
98	ST		16.511										0.485541	0.0986099
99	ST	trans-alpha-Bergamotene	16.532	1432			0.0743945	0									2.45821	0									1.8959	0
100	ST	beta-Copaene	16.533	1430					0.698857	0.34402					0.247528	0.06422			0.651703	0			0.0994318	0.0555497
101	Phenolic acid/ester		16.63																										1.0098	0
102	Acid/ester		16.65																										1.98962	0.326387		2.18854	1.15422
103	ST	alpha-Guaiene	16.654	1437									0.103663	0.0413853													0.273391	0.0627106				0.923352	0.166129
104	ST		16.722				0.065714	0
105	ST	Z-beta-Farnesene	16.774	1443																			0.979109	0.551397	4.33033	0.904313								5.02658	3.01283				0.436822	0.436573
106	ST		16.818		0.645181	0.115205							0.230411	0.0450607							0.126547	0					0.277671	0
107	ST		16.822												0.137431	0.0267635			0.126547	0	0.180167	0
108	ST		16.902						0.139482	0					0.203025	0.0516591	0.101539	0	0.180167	0												1.60314	1.33971
109	Phenylpropanoid	E-Isoeugenol (2-Methoxy-4-((E)-1-propenyl)-phenol)	16.972	1447													0.230423	0	0.00592896	0.000265378							0.087904	0			0.921805								0.225768	0.0672478
110	ST		16.991														0.801879	0			0.676208	0.914293					1.02473	0				9.3344	13.9343
111	ST		17.01						0.308962	0.12039
112	ST		17.027						0.4763	0.141461					0.320743	0							0.157301	0.0903157								2.37358	0
113	Unknown		17.033																										0.366742	0
114	ST		17.048																						0.202847	0.0149902						0.244752	0	0.185236	0.0619536
115	ST		17.111																													0.098134	0	0.354788	0.0648661
116	Phenole		17.131																		0.147632	0			0.292258	0.104238						3.88807	6.21231	0.331946	0.15771
117	ST	trans-beta-Farnesene	17.147	1458													0.203664	0			1.75644	0
118	ST	alpha-Humulene	17.166	1452	0.113939	0	0.0459894	0					0.344488	0.0727744	0.255465	0.085909	2.92756	2.48741	0.147632	0			0.349778	0.201443	0.296337	0	2.66949	6.46248				1.233	0	0.199621	0.193919
119	ST		17.239														0.382769	0														1.01079	1.26897
120	Phenole		17.257																		1.24777	0			0.0782883	0						0.373898	0.18905	0.0986958	0.0194855
121	ST		17.258														0.467339	0									0.775505	0
122	ST	Allo-Aromadendrene	17.292	1461											1.27084	0.544691			1.24777	0			0.528935	0.287813								0.333916	0.380774
123	Aliphatic compound		17.35						0.122039	0											0.832189	0										0.380388	0.0157784
124	ST		17.35						0.118817	0.012172			0.0882091	0	0.376213	0.0213672			0.832189	0
125	ST		17.565														1.68786	0	0.676208	0.914293							0.257855	0.0837947			6.24542	0.104306	0
126	Phenole		17.567																		0.196064	0							0.124933	0				0.0591042	0
127	ST		17.601				0.0496787	0							0.657958	0.347725	0.39737	0	0.196064	0			0.154545	0			0.314539	0										0.0490052
128	ST		17.644														12.4452	0									10.5688	0				0.868377	0.497906
129	ST	gamma-Muurolene	17.66	1477	0.215912	0							0.0743864	0.0312215	1.1661	0.424621			1.75644	0			1.13021	0.613043			0.171561	0				4.00995	0
130	ST	ar-Curcumene	17.727	1479			0.33848	0									0.759917	0									2.65435	0	0.0531775	0				0.063464	0
131	ST		17.755														0.628751	0
132	ST		17.764										0.990035	0.659342	0.220979	0.0476718											1.47538	1.1036				0.146029	0
133	ST	Germacene D	17.793	1480	0.15252	0.0378468			16.4882	6.54994			0.170721	0.00175454
134	ST		17.806																								0.198905	0.0557227
135	ST		17.821																										0.69329	0.317054
136	Benzoic acid/ester		17.838																										11.1415	4.5605
137	Acid/ester		17.966																		0.831948	0							0.273978	0.0215423		0.684762	0.500223
138	ST		17.97										0.367861	0.0467414
139	ST		18.006										0.149752	0.0517483	0.173947	0.0782265	0.458459	0	0.831948	0	0.456621	0			0.0467016	0	0.408149	0.175637						0.0507108	0
140	Aliphatic compound		18.017						0.107024	0									0.456621	0	1.99698	0														0.114101	0.0249214
141	ST		18.067																1.99698	0			0.0868653	0								0.247767	0.0130441
142	ST		18.087										0.117564	0.0385535	0.491831	0.0947452							0.102949	0			0.441844	0				0.536373	0
143	ST	beta-Selinene	18.087	1485																							1.01679	0
144	ST		18.106						0.281534	0.127988
145	Alcohol/aldehyde/ketone	Tridecanone	18.117	1495																												11.0386	0			0.0938999	0.0267161
146	ST	alpha-Selinene	18.171	1498									0.328431	0.290691	1.07988	0	0.696476	0.0253314			2.57061	0					0.608503	0.63073	0.117943	0		0.508919	0
147	ST		18.177						0.330472	0.144196			0.0817882	0.0311667	1.2667	0.396228	0.391827	0	2.57061	0							0.126451	0.0163921
148	ST		18.192						0.356783	0.11625															0.0676385	0						0.476368	0.267343	0.0584438	0
149	ST	alpha-Muurolene	18.325	1500											1.70502	0.746275					0.0181332	0.00323555							0.0840737	0		0.662431	0.670588					0.258339
150	Aliphatic compound	Pentadecane	18.342	1500	0.118998	0			0.199719	0.0903473					0.310684	0.162675			0.0181332	0.00323555			0.070685	0			0.813993	0.405097	0.138396	0.0423805	0.640241			0.0935559	0.00564911
151	ST		18.345										1.20716	0.683733	0.0553467	0											1.37425	0				1.06641	0
152	ST	beta-Bisabolene	18.378	1509													0.693357	0									0.442232	0
153	ST	alpha-Farnesene	18.393	1508									0.0618487	0															0.15535	0.0312178		0.826375	0.368075
154	ST	alpha-Bulnesene	18.401	1505																	7.09059	0					0.119679	0				1.30004	0.693161
155	ST		18.414				0.0942646	0									1.84845	0									1.79005	0				0.201772	0.0401086
156	ST		18.514														1.23624	0									0.273604	0
157	ST	gamma-Cadinene	18.603	1513			0.142999	0	0.115079	0.00208573			0.0667299	0	3.44246	1.4157	0.984911	0	7.09059	0	1.85407	0	0.127187	0.0628298			0.134188	0.0987593	0.0773824	0.0269829		0.247507	0.0356185
158	ST		18.655		0.25872	0.0110055									0.373281	0			1.85407	0	8.87319	0	0.231435	0.08629								1.90194	1.04313
159	ST	delta-Cadinene	18.751	1522			0.121323	0.027511	0.152433	0.0527178			0.228286	0.0635583	6.10299	2.7331	1.20925	0.849179	8.87319	0			0.256014	0.0943084			0.487184	0.258937	0.099334	0.0380993
160	ST		18.76										0.283964	0.140599							2.06105	0										0.384218	0.193165
161	ST		18.793										0.248535	0	2.91806	3.81613			2.06105	0	0.724383	0										0.058242	0
162	ST		18.828														0.275402	0									0.43613	0				0.902294	0
163	ST	beta-Sesquiphellandrene	18.828	1521													1.14043	0									0.304158	0
164	ST	trans-Calamenene	18.838	1521									0.166778	0.0622146	0.321314	0.20512			0.724383	0							0.191995	0				0.999555	0
165	ST		18.879												0.633585	0.500471													0.0721602	0
166	Unknown		18.897																															0.308087	0.0626975
167	ST		18.908																				0.106013	0.0488294								2.16213	0
168	Phenylpropanoid		19.008
169	Phenylpropanoid		19.025																													0.125608	0
170	ST	alpha-Copaene-11-ol	19.116	1539									0.483892	0.518963			0.973785	0			0.419441	0					1.41981	0				0.155561	0
171	ST		19.132												0.422649	0.181469			0.419441	0
172	ST		19.165										0.0839805	0.0159393			0.350119	0			1.19304	0										0.227315	0.109396
173	ST		19.17												0.759256	0.292979			1.19304	0	0.237276	0
174	ST	alpha-Calacorene	19.272	1544									0.187295	0	0.107746	0.00831439			0.237276	0							0.436751	0
175	ST	Selina-3,7(11)-diene	19.277	1545									0.261293	0
176	ST		19.335										1.46342	1.06387							0.163973	0	0.114226	0			0.257366	0.0915658
177	Aliphatic compound		19.487																0.163973	0									0.0526735	0
178	ST		19.499																				0.131615	0.07194
179	ST	Elemol	19.564	1548									12.6849	8.62801
180	Unknown		19.623																															0.638812	0
181	ST		19.684										0.153556	0.0406577																		0.800635	0.119547
182	ST		19.793																		0.318895	0							0.226848	0				0.0648784	0
183	Terpenoid		19.84																0.318895	0
184	ST		19.909																		0.418643	0			0.0835877	0.00409182								0.0904013	0.0308105
185	ST		20.013										0.267434	0.0851943					0.418643	0
186	Benzoic acid/ester		20.037																										0.271509	0.0742876
187	ST		20.096																				0.235776	0.0991104										0.120276	0
188	ST	Germacene D-4-ol	20.109	1574			0.105442	0.0490947	0.220187	0.0924775													0.3125	0.156717
189	ST		20.148										0.0604314	0.00570462	0.127393	0																1.82349	0.793116
190	ST	Caryophyllene oxide	20.235	1582			0.154548	0.0654763					0.0960777	0.0371985	0.192038	0.00153039	1.13133	0.900716					0.226181	0.0834952	1.95364	0.426968	0.895177	0.529666						2.04269	0.896957				0.366711	0.268515
191	ST		20.329																				0.347993	0.124752
192	ST		20.376																		0.0950752	0	0.159544	0.0699286
193	ST	Gleenol	20.431	1586											0.124869	0.0035706			0.0950752	0
194	Phenolic acid/ester		20.433																										0.149534	0
195	Phenylpropanoid		20.434																															0.240095	0
196	ST		20.497										0.172844	0.0619188													0.268682	0				0.991209	0
197	ST		20.6										3.04526	1.4412													12.2093	4.0058											0.386124	0
198	Alcohol/aldehyde/ketone		20.624								0.116154	0.0252906
199	ST		20.63						0.10913	0																						0.119994	0.0217676
200	Acid/ester		20.651																										0.101067	0									0.199803	0.0321121
201	ST		20.659																						0.103117	0								0.0868284	0.0105986
202	ST		20.674												0.106084	0.0181892																0.276983	0.2815
203	ST		20.72														0.583617	0									0.375739	0.0956355				0.275498	0.318512
204	Aliphatic compound	Hexadecane	20.734	1600											0.133927	0.0736353			0.00740569	0.00115581							0.516004	0.28415			0.319837	0.26872	0.0314332
205	ST		20.818												0.116639	0.0164151									2.14311	0.50034	0.247021	0				0.387008	0	1.53886	0.605071				0.291379	0.186665
206	ST		20.849																													0.169416	0.0278645	0.267126	0
207	Alcohol/aldehyde/ketone	Tetradecanal	20.917	1611							4.71594	6.04606																								1.75414	0.358111
208	ST		20.923																		0.136464	0	0.30306	0.131946								0.731782	0.911665
209	ST		20.953												0.228554	0.0401181	2.99191	0	0.136464	0			0.172646	0.0489347	0.323616	0.0653253	1.34822	1.1069						0.44843	0.12977				0.176873	0.0190369
210	ST		20.958										0.140399	0.0548695							0.714922	0					0.225947	0.0943536
211	ST		21.007												0.286731	0.165632			0.714922	0	0.00968891	0.000493313										2.18383	2.29598
212	ST		21.024																0.00968891	0.000493313											2.74711
213	ST		21.038										0.30271	0.138691							0.832488	0	0.0611368	0.0166725								0.396956	0
214	ST		21.083												0.596034	0.0173323			0.832488	0
215	ST		21.161										2.1966	0.0639589									0.0619531	0
216	ST		21.164																															0.0833051	0.0297095
217	ST		21.202																				0.415932	0.190763										0.0530326	0
218	ST		21.369												0.499696	0.393423
219	Phenole		21.392										0.859333	0.206697			1.19579	0									1.5643	0
220	ST		21.393														3.18406	0									0.762658	0.629713						0.162757	0
221	ST		21.393										2.07358	0.414864	0.0697202	0											1.06043	1.2939											0.167626	0
222	ST	gamma-Eudesmol	21.422	1630									3.6865	1.37145			3.15261	0									2.8827	2.1649				0.171688	0.15867						0.227021	0
223	ST		21.434																						0.444508	0.0167511								0.953619	0.980262				0.315166	0
224	ST	alpha-Acorenol	21.452	1632									1.12715	0.629877			0.303597	0									0.731746	0.865053
225	ST		21.52														0.825719	0									0.253199	0				2.59506	0.447714
226	ST		21.536																						13.7113	2.13788								15.1246	9.07173				1.48638	1.34147
227	ST	Hinesol	21.583	1640									0.796333	0.196771													0.49964	0.533326						21.1592	0
228	ST		21.659										0.0993356	0.00432144													0.17009	0.0168983
229	ST		21.671																		6.53394	0			0.599068	0.117521						1.07917	0.326959	0.899405	0.166684				0.23615	0
230	ST	t-Cadinol	21.702	1638											3.18268	1.34495			6.53394	0																			0.144362	0
231	ST		21.733																		1.45415	0	0.170976	0.0622551								0.260157	0.102989
232	ST	delta-Cadinol	21.735	1644											0.831227	0.383257			1.45415	0	2.02338	0										0.267867	0.0993867
233	ST	t-Muurolol	21.735	1640											1.13212	0.515704			2.02338	0
234	Alcohol/aldehyde/ketone		21.743																						0.176829	0								0.186651	0.0372454
235	Alcohol/aldehyde/ketone		21.809										0.272619	0.0392864													0.299837	0.106534
236	ST		21.838																															0.97659	0
237	ST		21.917																		6.36746	0	0.178917	0.0747808	0.305975	0						0.638599	0.355222	0.411927	0.0441608
238	ST		21.936														0.312649	0									0.437271	0
239	ST	alpha-Cadinol	21.941	1652			0.101256	0							3.40873	1.53138			6.36746	0							0.21136	0	0.05544	0				0.280852	0.0875012				0.201506	0.0124224
240	ST		22.005																				0.432805	0.183723								0.254893	0.156327
241	ST	Eudesmol	22.009	1652									18.8359	5.23205			5.35284	4.93683									8.73995	12.0632				0.256566	0.159059						1.661	0
242	ST		22.079																										0.241335	0		0.338578	0.06179
243	ST		22.114																						3.1375	1.19063						0.944192	0	3.36098	2.55373				0.640673	0.434223
244	ST	Bulnesol	22.167	1666									3.24645	2.06192													9.64885	2.84828											0.328381	0
245	Acid/ester		22.175										0.533972	0.071511			0.762677	0														0.372041	0.0772845
246	ST		22.177																						1.43499	0.667791						0.0818596	0	3.14346	2.49293				0.51964	0.229906
247	ST		22.186																						0.243005	0.132817								0.47157	0.0927557				0.180655	0.0906672
248	Cinnamic acid/ester		22.322										0.106206	0.00140359													0.214113	0.11374				0.271161	0
249	ST		22.441																						0.655764	0.0621915								0.742737	0.27582				0.165521	0.105521
250	Alcohol/aldehyde/ketone		22.456										0.176128	0.034188
251	ST		22.515														0.678327	0									0.340308	0
252	ST		22.56										0.20187	0.0934971																				0.270488	0.136371
253	ST		22.561														0.378462	0									0.282395	0
254	ST		22.573						0.638804	0.169584													0.58367	0.394764
255	Alcohol/aldehyde/ketone		22.576																						0.235809	0								0.122133	0.0575898
256	ST		22.627						0.145955	0.0687362													0.0842685	0.0294272
257	ST		22.714				0.0514432	0	0.080546	0.0206829													0.389305	0.126567
258	ST		22.778																						0.163529	0								0.170161	0.00398802
259	Alcohol/aldehyde/ketone		22.833																		0.100894	0.0971389														0.161543	0.0459077
260	Aliphatic compound	Heptadecane	23.005	1700															0.100894	0.0971389
261	Terpenoid		23.023																						0.39528	0.0494596								0.471489	0.306581				0.185871	0
262	ST		23.027																						0.0568937	0								2.08313	2.5641
263	ST		23.13																						0.165394	0.0929361								0.144142	0.0428168
264	ST		23.178												0.210566	0
265	Unknown		23.293																						0.138159	0								0.234983	0.236818
266	ST		23.327																						0.17652	0						0.313913	0.16101	0.131115	0.0572796
267	Acid/ester		23.413
268	ST		23.589																						1.77446	0.39662	0.159909	0						1.24494	0.394051				0.41023	0.199107
269	Phenolic acid/ester		23.6																															0.161676	0.0537932
270	Unknown		23.632				0.303099	0.217339					0.048526	0									0.993832	0.166176					0.115025	0
271	ST		23.647																								0.300783	0.227036
272	ST		23.693																						1.26172	0.0196138								0.594138	0.28482				0.194313	0.0383461
273	Unknown		23.949								0.417387	0													0.149105	0.0569878						0.130479	0						0.216215	0.00784379
274	ST		23.981																						2.30719	0.334109								2.53919	1.88447				0.568246	0
275	ST		24.035																						0.51992	0.0387787						0.11248	0	0.845026	0.686038				0.26762	0
276	ST		24.121																						1.26636	0.192331								0.804	0.547586				0.406912	0.140036
277	ST		24.383																				0.155547	0.0841734	1.12641	0.0551247						1.10812	0.378943	1.27123	0.616333				0.550425	0
278	Phenolic acid/ester		24.485																		0.192117	0.032257										7.75252	12.1941						0.270697	0
279	Benzoic acid/ester		24.493																0.192117	0.032257							0.216994	0.0722016	5.9853	2.27955									0.925793	0.715334
280	ST		24.589										0.57061	0.116254			0.178989	0									0.802997	0
281	ST		24.721										0.216369	0.0600599																		2.33997	1.16087
282	ST		24.74												0.200997	0							0.125808	0.0206771	21.1879	0.567273								28.3795	12.3633				0.906063	1.20477
283	Alcohol/aldehyde/ketone		24.854																						1.12692	0.373432								0.888754	0.27739				0.402813	0.205079
284	ST		24.982																													0.0572507	0	0.464864	0
285	ST		25																				0.167421	0.0225331
286	ST		25.015										0.105949	0.0628283													0.361674	0
287	ST		25.018																						1.96857	0.0516126								1.50955	0.835568				0.364074	0.200775
288	Alcohol/aldehyde/ketone		25.038						0.162494	0																													0.199411	0
289	Acid/ester		25.07								0.355166	0.0139948																				0.0764541	0.00488879
290	Acid/ester		25.077																																				0.216587	0.0176785
291	ST		25.099												0.0591784	0					0.0212016	0			1.4529	0.101891								1.19758	0.761159				0.347767	0.193988
292	Benzoic acid/ester	2-Ethylhexyl salicylate	25.132	1807															0.0212016	0			0.10136	0.00107613										0.144547	0
293	ST		25.199																						0.807855	0.0252166								1.38248	0.55654
294	ST		25.226																						0.421067	0.0972076	0.130138	0						0.422208	0.100569				0.235747	0
295	Acid/ester		25.277						0.0810234	0.0272576			0.211038	0.172001									0.129815	0.0689937			0.405386	0
296	ST		25.284																				0.0861724	0.0282704
297	ST		25.332																															7.93087	0
298	Alcohol/aldehyde/ketone		25.397																						0.180049	0.0201327						0.123058	0	0.137085	0.0588049				0.194949	0
299	Alcohol/aldehyde/ketone		25.402						0.281797	0.186464	1.17784	0																								0.22125	0.08217
300	ST		25.444										2.05507	0.338853			0.597745	0									0.72162	0.967749											0.26689	0
301	ST		25.482																															0.200079	0
302	ST		25.494																															0.340783	0
303	ST		25.517																						0.532179	0.0861389	0.156619	0						0.470233	0.259067				0.18911	0
304	ST		25.55										0.158456	0.0385717													0.246712	0
305	ST		25.592																															0.206575	0
306	ST		25.624				0.106479	0															0.367942	0.0721007
307	Cinnamic acid/ester		25.685												0.0588478	0											0.257384	0.105605
308	Alcohol/aldehyde/ketone		25.751												0.062327	0									0.118564	0.0426193								0.116758	0.0542726
309	Terpenoid		25.873																						0.105031	0.0521821								0.0826495	0.0374207
310	Terpenoid		25.996																															0.100998	0
311	Benzoic acid/ester		26.141																								0.233567	0.0963139	7.17866	0.906573									0.19593	0.0970912
312	Terpenoid		26.193																				0.108151	0.0422602
313	Terpenoid		26.312																															0.121834	0
314	Terpenoid		26.386																				0.251621	0.0712674
315	Terpenoid		26.396																		0.044998	0.0184525										2.0429	2.40067	0.112822	0.01385
316	Benzoic acid/ester	Benzyl salicylate	26.428	1864									0.081961	0	0.078586	0	0.867104	0	0.044998	0.0184525							0.492178	0	12.6839	1.10509									0.335114	0.151011
317	DT		26.44																																			0.22059
318	Terpenoid		26.511										0.101951	0.0169662							0.0797896	0.0598621					0.082159	0
319	Acid/ester		26.549																0.0797896	0.0598621
320	DT		26.633																																			0.109505
321	Phenolic acid/ester		26.684																						0.35985	0.140648								0.127093	0.0775632
322	Cinnamic acid/ester		26.696										0.0837725	0.012297													0.178508	0.072152
323	Alcohol/aldehyde/ketone		26.704																										0.0996577	0
324	Acid/ester		26.859																						0.198469	0.12641								0.429893	0.290575
325	DT		27.068																																			0.326436
326	Unknown		27.089																						0.0705025	0.0255482								0.189177	0.0942176
327	Acid/ester		27.196						0.11074	0.00269834											0.0537518	0.065397										0.384462	0
328	DT	Geranyl linalool<(Z,E)>	27.208	1898			0.143461	0.0154137
329	Aliphatic compound	Nonadecane	27.223	1900															0.0537518	0.065397
330	DT		27.288				0.0597204	0																														0.537094
331	Terpenoid		27.496																						1.58674	0.0753095						0.717455	1.03979	2.23598	1.48782				0.301773	0.202749
332	Acid/ester	Hexadecanoic acid methyl ester	27.679	1927									0.168358	0.0511286	0.0461423	0											0.35107	0
333	DT		27.696				2.67713	2.42927																							0.544261
334	DT		27.721																													0.116655	0	0.11398	0
335	DT	Rosa-5,15-diene	27.725	1933			0.124764	0																														0.107832
336	Phenolic acid/ester		27.799
337	Acid/ester		28.028																										0.144814	0.0821625
338	DT		28.06																		0.0166311	0.000453853			0.0619964	0						0.248101	0	0.245337	0.173359
339	DT	Cembrene	28.063	1942			2.23004	2.12855																							0.339892							0.488807
340	Benzoic acid/ester		28.096																0.0166311	0.000453853	0.243505	0
341	Aliphatic compound		28.096																0.243505	0
342	Phenolic acid/ester		28.167																										0.283519	0.0111603
343	DT		28.198																						0.346518	0								0.0960423	0.0280728
344	DT		28.267				0.556079	0
345	DT		28.3																						0.0824977	0								0.460424	0.178305
346	Acid/ester		28.341																																				0.267787	0.172206
347	Acid/ester		28.351																										0.1254	0.0481147
348	DT		28.362																															0.266643	0
349	Acid/ester		28.379																												0.382934
350	Cinnamic acid/ester		28.398																										0.153659	0.0158895
351	DT		28.44				0.186759	0.0129148
352	DT		28.44				0.114678	0.0292716
353	DT		28.448																															0.238635	0
354	DT		28.47												0.202783	0													0.115268	0
355	DT		28.592												0.19494	0.138154											0.163092	0.00411648	0.431962	0.0501078
356	Acid/ester		28.617		0.293027	0																					0.213841	0										0.0775435
357	Unknown		28.638		0.260471	0	0.118593	0.0319252																														0.110425
358	DT		28.653																						1.02455	0.3356								0.634525	0.327426				0.257532	0
359	Cinnamic acid/ester		28.721												0.12315	0.00514081											0.162839	0	1.14504	0.152101
360	Benzoic acid/ester		28.729																										0.519723	0.39396									0.109361	0
361	Unknown		28.828																						0.232256	0.0143811			0.226778	0				0.224423	0.0938718
362	DT		28.828				0.0715903	0.0105103																					0.302833	0.0131002
363	DT		28.867																						0.105438	0								0.108894	0
364	DT		28.883				0.16129	0.0936386																														0.0988934
365	Acid/ester		28.924										0.205469	0.0320355													0.0665955	0
366	Acid/ester		28.932														0.290357	0									0.266468	0.15042	0.299887	0.0349454
367	Unknown		28.966				0.612507	0.302209
368	DT		28.98				0.204199	0.0423311
369	DT		29.029		0.191005	0.0542008																																0.0723971
370	DT	Kaur-15-ene	29.055	1997			0.128158	0																														0.126105
371	Acid/ester		29.077										0.0899801	0.0240288																		0.139847	0.142491
372	Acid/ester		29.11																																				0.294928	0.0582825
373	DT		29.137				0.0875329	0.01314
374	Unknown		29.14								0.93258	0.116387																								0.0542058	0
375	Cinnamic acid/ester		29.185																										0.354055	0.0604171
376	Cinnamic acid/ester		29.235																										0.473445	0.127318
377	DT		29.303		0.191617	0.0873876	0.173134	0.0252077																							0.640595
378	DT		29.339																															0.117988	0
379	Unknown		29.358		0.423495	0.254022	0.893661	0.159071																														0.562132
380	DT		29.358																																			0.11537
381	DT		29.452		0.19879	0.0541952	0.0754535	0
382	Terpenoid		29.485																										0.224675	0
383	DT		29.531				0.822239	0																								0.695782	0
384	Alcohol/aldehyde/ketone		29.549								0.298335	0.155514	1.65071	0.541375	0.431105	0	0.26103	0	0.00829198	1.98151e-05							0.321268	0.176738								0.10066	0.0346633
385	Alcohol/aldehyde/ketone		29.556								0.453799	0.31786															0.0615702	0								0.13384	0.0337143
386	DT	Geranyl linalool <(E,E)>	29.587	2026			6.1358	0.509147
387	DT		29.739																						0.0808415	0.000327708								0.139077	0.107085
388	Phenolic acid/ester		29.74																										0.622318	0.0442327
389	Phenolic acid/ester		29.806																										0.171538	0.00807619
390	DT		29.869				6.97661	0																							1.85623
391	DT		29.885				0.0684463	0																														0.11551
392	Cinnamic acid/ester		29.912												0.480761	0.250513	0.589574	0.220498									0.331462	0.151898
393	DT		29.934										0.079641	0.0279895
394	Unknown		29.999				0.0857769	0																														0.305206
395	DT		30.006																													0.572241	0					0.260069
396	Unknown		30.058										0.053556	0			0.541883	0									0.161013	0
397	Unknown		30.067		0.149738	0
398	DT		30.093		0.181261	0.0796645																									3.70928
399	DT	Abietatriene	30.109	2055																																		0.138691
400	DT	13-Epi-Manool	30.118	2059			3.79795	0.830048																								0.65219	0.685548
401	Unknown		30.268																												8.9381
402	Phenolic acid/ester		30.358																						0.0633289	0						0.486254	0	0.0814179	0.024866
403	DT		30.39
404	Unknown		30.403				0.125642	0.00129768																														0.65331
405	DT		30.502
406	Cinnamic acid/ester		30.519												1.2995	0.524899	1.20849	0.373126									0.592935	0.42978
407	DT		30.595																																			0.569344
408	Unknown		30.612				0.101228	0																								0.0529492	0
409	Benzoic acid/ester		30.635												0.0745721	0.00367498											0.335696	0.156679
410	Aliphatic compound		30.638								0.109281	0.0030406			0.451399	0
411	Acid/ester		30.673
412	DT		30.692		0.248863	0.0888177	0.279822	0.000150036																							8.80726							0.0985619
413	Terpenoid		30.858										0.233055	0.0602098	0.405284	0.0408666	0.577673	0									0.548098	0.411937				0.308702	0.26386
414	Aliphatic compound		30.881										1.21195	0.870002	0.0781516	0											0.310194	0.18606
415	Acid/ester		30.926																		1.32818	0.0491592							0.352333	0.273174		11.5799	19.111
416	Cinnamic acid/ester		30.929				0.145967	0.0165534
417	Phenole		30.967																										0.67343	0.0645943		0.515963	0
418	Phenolic acid/ester		30.968	1940															1.32818	0.0491592							0.246819	0.0808356	0.100872	0									2.11889	1.263
419	Aliphatic compound		30.977										0.506384	0.274764	0.118683	0.061784											0.246264	0
420	DT		30.983																																			0.109479
421	Alcohol/aldehyde/ketone		31.018										0.984646	0.640555	0.170151	0.0676328											0.367439	0.341538				0.0787783	0
422	Cinnamic acid/ester		31.025																		0.247186	0.0782098							3.48862	0.642299		0.450261	0
423	Unknown		31.068		0.214009	0																																0.0513372
424	Aliphatic compound	Heneicosane	31.069	2100											0.053961	0			0.247186	0.0782098					0.173727	0.00843955	0.208104	0.105756						0.267791	0.15969				0.173729	0.0338739
425	Alcohol/aldehyde/ketone		31.112										0.636107	0.300294	0.18194	0											0.326316	0.155085				2.44655	0
426	Unknown		31.142				0.681323	0.109421
427	Unknown		31.184				1.28487	0.329856																								0.219962	0.153756
428	Cinnamic acid/ester		31.218										0.0767889	0.0125355	0.302176	0.142559	6.13269	0									0.587417	0.318832	0.881897	0.536313									0.335532	0
429	Unknown		31.232		0.185633	0	0.133726	0.073597
430	Terpenoid		31.355				0.15057	0
431	Alcohol/aldehyde/ketone		31.365										0.232421	0.0177262													0.317961	0.115299
432	Terpenoid		31.473										0.0643618	0	0.186664	0
433	Acid/ester	linoleic acid	31.474	2123											0.452658	0.203122											0.698883	0.887625				1.63862	2.39477
434	Unknown		31.515										0.270492	0.0842191	0.10454	0											0.603332	0.533858
435	Acid/ester		31.547								0.249785	0
436	DT		31.618																		0.544209	0										0.507717	0.291528					0.102129
437	Acid/ester		31.679										0.250829	0.0149976	2.06696	1.02576											3.78491	6.6471											0.202188	0
438	Unknown		31.685				0.344363	0.053466
439	DT		31.791		0.258875	0.144908	0.747021	0.0448963																							0.287406
440	DT		31.835				0.767188	0.423221
441	DT		31.932		0.180023	0	0.181843	0.0400955																														0.0926755
442	DT		31.97																																			0.147106
443	Acid/ester		31.973														0.608203	0											5.08337	1.46145									0.245395	0.143939
444	Acid/ester		32.104																0.544209	0
445	DT		32.106		0.17439	0.00977548	0.196699	0.0503466																														7.39957
446	Acid/ester		32.108														0.749678	0														0.215206	0
447	Alcohol/aldehyde/ketone		32.113
448	Cinnamic acid/ester		32.115										0.100627	0	0.488728	0.37677	5.3341	0									0.516565	0.421605	0.97019	0.353713
449	Acid/ester		32.115						0.121329	0			0.137384	0
450	DT		32.19																										0.313418	0
451	Acid/ester		32.223						0.19301	0							1.3061	0																					0.129051	0
452	DT		32.261				0.365711	0.042985																								0.207047	0.237149
453	DT		32.29				0.13079	0.00538459
454	Phenolic acid/ester		32.4																										0.172181	0
455	DT		32.436				0.0837931	0																														0.120486
456	DT		32.438		0.239934	0.0863578	0.393653	0.0711726																														0.158615
457	DT		32.448										0.0625166	0.00719035													0.231433	0.108496
458	DT		32.509				0.103618	0.00159202																														0.406419
459	Alcohol/aldehyde/ketone		32.518										0.173374	0													0.0869139	0
460	DT		32.606																																			0.176196
461	Unknown		32.72				0.0985086	0.00353838
462	DT		32.757				0.108854	0																														0.0969113
463	Acid/ester		32.767						0.332255	0.283426																	0.0990878	0
464	Acid/ester		32.793										0.0548905	0							0.014698	0.00443883					0.167913	0
465	Aliphatic compound	Docosane	32.854	2200															0.014698	0.00443883												0.925199	0						0.259491	0.101891
466	DT		32.867				0.0984718	0.0126032													0.049991	0.00299159																0.3588
467	Cinnamic acid/ester		32.881										0.151668	0	3.15088	1.43076	9.95665	5.5543									2.6034	1.25951											0.146582	0.0270195
468	Acid/ester		32.902												0.295601	0.0536431
469	Acid/ester		32.974												0.306553	0																0.258316	0.238833
470	Acid/ester		33.015
471	DT		33.154		0.431233	0.285517	0.360659	0.00139962																														1.23542
472	Alcohol/aldehyde/ketone		33.298										0.798703	0.306385	0.635081	0	0.241703	0	0.049991	0.00299159							0.285359	0.0915771	0.110627	0.000255504						0.0738145	0
473	Acid/ester		33.3																								0.217457	0.0388394								0.0916132	0
474	DT		33.31		1.68713	0.986747	2.21808	0.0140618																							1.08541							0.0457593
475	Phenolic acid/ester		33.377		4.61512	3.37907	0.461457	0.0801222
476	Cinnamic acid/ester		33.452										0.12206	0.0443376	0.38255	0.117881	1.39073	1.10958									0.428424	0.255642
477	Acid/ester		33.483														0.886104	0									0.146915	0.0678621
478	Phenolic acid/ester		33.507																										0.192939	0
479	Terpenoid		33.665		0.112698	0	0.276438	0.075544																														3.21616
480	Terpenoid		33.773												0.285848	0.0361383	0.890805	0.517142									0.459903	0.346431
481	DT		33.843		1.84149	0
482	DT		33.844				0.354628	0.0770818													0.12809	0.00998715
483	Unknown		33.877		2.26606	1.59099	1.61008	0.281767																							1.21417	0.61301	0.285349					0.854842
484	Terpenoid		33.94												8.01061	3.61434	15.6444	8.47536									6.56264	3.11591				0.308378	0						0.371956	0.19072
485	Cinnamic acid/ester		33.94																								0.488887	0.44586			0.309802	0.0958464	0.0430885						0.107538	0.0094179
486	Alcohol/aldehyde/ketone		34.042																								0.30523	0.147141	0.16297	0		0.313266	0.251255			0.101569	0
487	Unknown		34.074				0.124899	0.0372377
488	Acid/ester		34.218										0.062141	0
489	Terpenoid		34.233										0.0632211	0.00803971													0.261192	0.162092	0.118993	0.0454276									0.291828	0
490	Aliphatic compound		34.283																0.12809	0.00998715			0.0976784	0.0371535
491	Acid/ester		34.348						0.169212	0
492	Phenolic acid/ester	Methyl isopimarate	34.355	2297			0.0876742	0.0248824
493	Terpenoid		34.362										0.158266	0.0599983	0.231409	0.160024	0.503215	0									0.248252	0.144116				0.467413	0.331157
494	Phenylpropanoid		34.412																								0.118996	0	0.108806	0
495	Acid/ester		34.45						0.172878	0
496	Acid/ester		34.456												0.0937248	0.0401152											0.186423	0.0730217
497	Phenylpropanoid		34.479		0.103707	0	0.0906144	0
498	Aliphatic compound	Tricosane	34.576	2300									1.40617	0.938237	1.10454	1.00972			1.8735	1.05297			0.377479	0.294956	1.78651	0.244556	2.19695	0.722888	1.8304	0.753594	2.24266			2.07674	1.02438	0.26437	0.171455	0.196335	1.45337	0.371118
499	Unknown		34.587		0.207907	0.0498996	0.272701	7.58904e-05													1.8735	1.05297										1.57836	1.48279					0.736753
500	DT		34.636		0.676043	0.424228	0.984363	0.26497													0.0348571	0									2.0066
501	Alcohol/aldehyde/ketone		34.671										0.192245	0.0288797					0.0348571	0							0.136429	0
502	DT		34.724		0.641895	0.326377	0.661063	0.274114																							1.10634
503	DT	Abietal	34.761	2313																																		0.458557
504	DT		34.782				0.413004	0
505	Unknown		34.877										0.135712	0			0.646997	0.424678									0.211652	0
506	DT		34.895		0.97282	0.856393	0.135886	0
507	Phenole		34.949														0.37705	0														0.102523	0.0139815
508	DT		34.987		0.453949	0.210111															0.405646	0.534219										1.18997	1.07557
509	Acid/ester		35.024										0.160796	0.0449104	0.109809	0			0.405646	0.534219							0.343382	0.283291											0.193394	0
510	Alcohol/aldehyde/ketone		35.026						0.291223	0.103087
511	Acid/ester		35.028		0.206771	0.0684107	0.394711	0.312646																														0.174823
512	DT		35.116		0.126006	0	0.475022	0.174544
513	Acid/ester		35.272						0.729285	0.515761
514	DT		35.279		0.461087	0.184593																										1.68274	0
515	Benzoic acid/ester		35.384												0.393442	0.288721	2.77736	0									0.512191	0.335635
516	Acid/ester		35.419
517	DT	Torulosol	35.483	2360			0.403655	0																								4.88604	0
518	DT		35.493		0.979695	0.553955	2.16969	0.973142													0.406532	0									0.800181	0.462774	0.334974
519	Phenolic acid/ester		35.588																0.406532	0							0.119633	0
520	DT		35.592		2.81733	1.94038	0.807621	0.420451																							0.80323	0.506296	0.331166					0.248572
521	Benzoic acid/ester		35.594												0.488958	0.285145			0.0420815	0.034678	0.111314	0					0.305379	0.155809											0.129132	0
522	Aliphatic compound		35.619										0.0501157	0					0.111314	0
523	Phenole		35.817														0.532187	0
524	DT		35.846		0.667309	0
525	DT		35.859		0.221717	0	0.342095	0																														0.0980301
526	DT		36.064				0.260807	0																								0.410876	0.324542
527	Flavonoid/flavone		36.07										3.29139	1.33929	3.39531	0.661173	11.9095	0.806333									3.04941	1.22127	4.3375	1.25172									0.339914	0.246811
528	DT		36.112				1.09036	0.602741																							1.27193	0.164952	0.105505					0.114017
529	Acid/ester		36.147						0.961596	0.825208
530	DT		36.203		3.58022	1.10216
531	Aliphatic compound		36.203												0.140508	0.00624666					0.314412	0.235631										0.0620866	0
532	Aliphatic compound	Tetracosane	36.231	2400									0.238628	0.107308	0.272706	0.206355			0.314412	0.235631							0.265256	0.0751594	0.257583	0.0984447				0.158174	0.0829035				0.175612	0.0302192
533	DT		36.273		10.2771	5.57862
534	DT		36.313		3.43957	0.682664
535	Benzoic acid/ester		36.328												0.115282	0.0144546											0.219883	0.117647
536	Alcohol/aldehyde/ketone		36.364										0.0893413	0.0155696									0.581357	0.34326			0.0957701	0				0.321389	0.355238
537	Acid/ester		36.41
538	Phenolic acid/ester		36.461														0.342338	0	0.0411246	0							0.224619	0.093952	1.74206	0
539	Phenole		36.51		0.988782	0.201234	0.588293	0																														0.225811
540	Benzoic acid/ester		36.546
541	DT		36.583																																			0.265962
542	DT		36.614		0.748534	0															1.61306	0.142614
543	Alcohol/aldehyde/ketone		36.629						0.208788	0			0.232619	0.0638837	0.484369	0			1.61306	0.142614
544	Phenole		36.637		1.31858	0.20322
545	Flavonoid/flavone		36.792		5.05857	0.704577
546	Phenole		36.91																																	0.0891188	0.0231177
547	Alcohol/aldehyde/ketone		37.026																													0.184685	0						0.254931	0.0827678
548	Unknown		37.029
549	Phenolic acid/ester		37.087		2.58467	1.22789																										1.87152	0
550	Alcohol/aldehyde/ketone		37.18						0.190857	0			0.352578	0.183967	0.146513	0.0874826											0.133228	0.0641844
551	Flavonoid/flavone		37.283												0.231726	0													0.0640158	0		1.22871	0.722184
552	Aliphatic compound		37.311																		3.13748	0					0.272708	0				4.48764	4.10371			0.147696	0.0502078		0.712853	0.381077
553	Phenolic acid/ester		37.343														0.279565	0	3.13748	0									0.898156	0.154302									0.525824	0.162985
554	Unknown		37.348								0.202246	0																								0.0556778	0
555	Flavonoid/flavone		37.364										0.40225	0.198361	2.91896	0.493885	1.83258	0									3.60919	2.29282	2.33829	0									0.184182	0.0388394
556	Flavonoid/flavone		37.459												0.297461	0											0.280566	0
557	Terpenoid		37.467		1.89941	0.514817
558	Terpenoid		37.543		0.729727	0.12528	0.363184	0													0.384188	0.338365										1.00154	0.67202					1.7242
559	Acid/ester		37.543										0.0877843	0.02786					0.384188	0.338365												0.261193	0.107246						0.306103	0.187791
560	Benzoic acid/ester		37.568																		6.80605	4.64888										0.159794	0.0147558
561	Aliphatic compound		37.581						0.358929	0.0843693					0.123223	0	0.409521	0	6.80605	4.64888			0.100911	0.0594336	0.332128	0.131505	0.524294	0	0.655575	0.265243				0.0943506	0.0625506	0.0843996	0
562	DT		37.812								0.563397	0.241537									21.3188	12.3978										2.82838	2.73633			0.333803	0.0769982
563	Aliphatic compound	Pentacosane	37.847	2500	1.00917	0.356306			0.179403	0.04484			2.3687	1.78066	3.50154	3.65398	0.409521	0	21.3188	12.3978			1.61976	0.723185	1.12414	0.536703	2.75289	1.31168	3.53907	1.21878	1.17452	0.104621	0	1.40799	0.593325	0.212027	0.0870355		3.8793	0.971518
564	Phenole		37.867																															0.411355	0
565	DT		38.051		0.975349	0.122448
566	Phenole		38.183						0.466987	0.118967	0.146301	0.00283803									0.738546	0.537135										0.733142	0.336903			0.17405	0.0766115
567	Acid/ester		38.258																0.738546	0.537135							0.204935	0											0.161501	0.011615
568	Alcohol/aldehyde/ketone		38.314																0.0365445	0.00257851												2.02866	1.66361						0.173087	0.00292558
569	Benzoic acid/ester		38.317																																				0.509806	0.401025
570	Benzoic acid/ester		38.356										0.075126	0	0.291172	0
571	Phenole		38.392		11.2322	6.36946
572	DT		38.471										0.259624	0	0.262796	0													0.230911	0
573	Cinnamic acid/ester		38.6														0.315524	0											1.1436	0.0333291
574	Phenole		38.665										0.168067	0.0849385	1.1241	0.486047	0.899901	0.742865									0.515542	0.224669	2.65194	0									0.179888	0.0595322
575	Alcohol/aldehyde/ketone		38.675						0.947675	0.501928																						0.181378	0.0150343
576	Acid/ester		38.683																																	0.0233192	0		0.186555	0
577	DT		38.75								0.487102	0.306872																								0.167866	0.00221305
578	Unknown		38.804						0.112121	0																						3.33956	2.89227
579	Phenole		38.894														0.688992	0									0.301047	0				0.143095	0.032567
580	Flavonoid/flavone		38.932										0.251232	0.150892	5.07686	1.77722	3.30144	2.66487	0.0132576	0.000784665							3.91003	1.99178	0.509496	0.453231		8.00064	3.18128						0.847466	0.426651
581	Phenole		39.078																																				1.56946	0
582	Acid/ester		39.084						0.179401	0.000368477
583	Flavonoid/flavone		39.245										0.115666	0.0228375													0.053044	0	0.497703	0.188648
584	DT		39.285																0.0209838	0	0.220672	0.20243			0.266792	0
585	Aliphatic compound		39.292																0.220672	0.20243
586	Acid/ester		39.306						0.289501	0											1.07602	0.534269																	0.13584	0.00217104
587	Aliphatic compound	Hexacosane	39.369	2600									0.248327	0.0467812	0.419319	0.247662			1.07602	0.534269					0.102999	0.02774	0.227108	0.181938	0.269109	0.112252	0.5728			0.157243	0				0.621791	0.146042
588	Phenole		39.403												0.412086	0													1.73585	0									0.238017	0
589	Aliphatic compound		39.412										0.0746754	0					0.0144958	0			0.0769464	0	0.106364	0			0.665909	0.190707						0.131019	0
590	Phenole		39.446										0.203005	0.0660246	0.904446	0.206578											1.46435	0.602622	0.104145	0									0.237616	0.0861749
591	Aliphatic compound		39.478																				0.167864	0			0.0549821	0						0.0631278	0
592	DT		39.489										0.0779456	0	0.279649	0.096429
593	Phenolic acid/ester		39.528												0.22697	0.004533											0.336433	0.208936
594	DT		39.608		0.241169	0																										0.156832	0
595	Acid/ester		39.666
596	Unknown		39.699												0.120558	0.0408986											0.253097	0
597	Acid/ester		39.796								0.170325	0.0171118																								0.196095	0.0436348
598	Flavonoid/flavone		39.834										0.0582933	0							2.24096	0.783374					0.119871	0
599	Alcohol/aldehyde/ketone		39.834										0.121792	0					2.24096	0.783374	0.4322	0.241994			0.0878752	0			0.10043	0				0.0533489	0	0.320118	0		0.182525	0.0356535
600	Unknown		39.939																0.4322	0.241994
601	Phenole		40.022										0.111833	0.0310429	0.418023	0.147113											0.211301	0.12377	0.238022	0									0.224601	0.075011
602	Phenole		40.033												0.217704	0.00922614
603	Acid/ester		40.043										0.0603113	0.00955027													0.104205	0								0.116437	0
604	Aliphatic compound		40.103								0.109772	0																	0.36295	0						2.02089	0
605	DT		40.137												0.250461	0
606	Flavonoid/flavone	Chrysin	40.25	2649																																			0.231512	0.0923354
607	Aliphatic compound		40.252										0.606583	0.0799813	0.163433	0.0487259			0.0427542	0.0393072							0.0752982	0				0.183119	0						0.200885	0.0202065
608	Aliphatic compound		40.339																										0.251081	0									0.225937	0.041229
609	Acid/ester		40.399								0.369994	0.211487															0.0879724	0								0.107628	0
610	Phenolic acid/ester		40.413										0.100288	0.0188737									0.0584691	0
611	Flavonoid/flavone		40.477																						3.5014	0.71613	0.0892805	0	1.27806	0.769161				2.53114	1.82935	0.101171	0		0.522831	0.339805
612	Terpenoid		40.494										0.161833	0															0.425757	0.316023		0.156501	0.0010641
613	Phenolic acid/ester		40.619																0.00574883	0																			0.171601	0.0101521
614	Acid/ester		40.619						0.283263	0.113144											0.200063	0
615	Aliphatic compound		40.644								0.355485	0	0.52657	0.454274					0.200063	0					0.155052	0.0278094	0.214375	0	0.903031	0.952407				0.063696	0.00541689	1.24026	0		0.263788	0.0838619
616	Flavonoid/flavone		40.69										0.131424	0.0214414	0.188368	0.0795884					0.234002	0.0185366					0.19277	0.0406244				0.0643208	0						0.270959	0
617	Alcohol/aldehyde/ketone		40.701										0.323511	0.110948					0.234002	0.0185366																			0.227026	0.0608849
618	Aliphatic compound		40.726						0.201687	0.0738622											28.9394	14.1742							0.147764	0		1.91213	1.75272						0.195205	0.0295235
619	Aliphatic compound	Heptacosane	40.843	2700					0.914675	0.163131	0.238428	0.0934932	6.6982	4.77744	7.53153	7.98046	0.710889	0.416205	28.9394	14.1742			0.568633	0.0660594	8.23748	6.8483	4.04645	3.22446	5.25668	2.1693				1.58195	0.76362	0.82314	0.527666		15.5778	3.43601
620	Acid/ester		40.996						0.7028	0.189056
621	Aliphatic compound		41.045								0.467701	0																	1.83946	0									0.236015	0.0640839
622	Aliphatic compound		41.108								0.270489	0	1.1145	0															3.35357	0						5.28176	0
623	Unknown		41.121														2.64198	0
624	Acid/ester		41.172						0.605569	0.169904	0.724705	0
625	Phenole		41.215						0.398919	0
626	Unknown		41.279						0.718121	0											0.122317	0.0594565
627	Aliphatic compound		41.294																0.122317	0.0594565												0.196451	0.0631022			1.3217	0		0.228143	0.0804215
628	Phenylpropanoid		41.431																																				0.380669	0.201478
629	Flavonoid/flavone		41.494												0.0885063	0.0307225									0.513719	0.0667947			0.0561882	0				0.490161	0.270086				0.297866	0.1088
630	Acid/ester		41.557																								0.308193	0
631	Unknown		41.611						0.283473	0
632	Flavonoid/flavone		41.68																										0.267032	0
633	Alcohol/aldehyde/ketone		41.716								0.866653	0																								1.35285	0
634	Acid/ester		41.793																													0.661528	0.533043						0.602507	0.433283
635	Acid/ester		41.911						2.40774	2.41043																	0.49217	0											0.311408	0.0603877
636	Acid/ester		42.078																																				0.539529	0.233136
637	Unknown		42.086																		0.350781	0							0.475129	0.388166		0.325813	0.0878406						0.541677	0
638	Alcohol/aldehyde/ketone		42.172																0.350781	0	0.380115	0.418083					0.634752	0
639	Aliphatic compound	Octacosane	42.221	2800					0.118414	0.026947	0.485309	0	0.529843	0.0838021	0.548172	0.469328			0.380115	0.418083							0.175352	0.0913661	0.320929	0.101457				0.132993	0				0.745984	0.149131
640	Unknown		42.246																				0.149543	0.0860428	0.0851797	0													0.271372	0.136634
641	Phenole		42.281																																				0.168166	0.0400772
642	Alcohol/aldehyde/ketone		42.357								0.86205	0	0.381679	0.224035	0.188728	0.0389616											0.219204	0	0.251675	0.0934687				0.0797537	0
643	Acid/ester		42.411						1.41459	0.395361
644	Terpenoid		42.55																0.0370255	0					0.331214	0								0.107826	0
645	Unknown		42.645																		2.21048	1.25645																	0.226926	0.0367011
646	Alcohol/aldehyde/ketone		42.723										0.0612368	0.00340176					2.21048	1.25645					0.412846	0								0.116252	0.0809989				0.201839	0.0755825
647	Unknown		42.743						0.283714	0.159365
648	Terpenoid		42.855																						0.115164	0
649	Unknown		42.889						0.473807	0																													0.213777	0.061418
650	Acid/ester		43.009																															0.240836	0.273423				0.126511	0.0012834
651	Alcohol/aldehyde/ketone		43.012										0.0665799	0.00276312									0.19304	0.119538
652	Terpenoid		43.014												0.300093	0
653	Unknown		43.086						0.255762	0.0574751
654	Aliphatic compound		43.102										0.268241	0.0642185	0.14329	0.00910409			0.0155726	0.00757665																			0.182912	0.0264357
655	Aliphatic compound		43.133																																				0.243555	0.0933795
656	Aliphatic compound		43.165																																				0.207277	0.0250819
657	Aliphatic compound		43.189										0.338746	0															0.087377	0.00860754									0.702475	0.178476
658	Unknown		43.291						0.563988	0.22329
659	Phenolic acid/ester		43.36																				0.0929723	0.0200475								0.101975	0
660	Unknown		43.36																																				0.170511	0.0278715
661	TT		43.415										0.115652	0	0.316966	0											0.0862068	0
662	Acid/ester		43.515						0.510609	0.273155											1.63908	0.959576										0.420877	0.389077
663	Aliphatic compound	Nonacosane	43.628	2900					2.98512	1.22553	0.551675	0.0903264	4.18072	3.22816	7.08634	8.19174			1.63908	0.959576			0.104284	0	0.88777	0	1.6402	1.15474	1.83618	0.721195				0.456444	0.566577	1.59459	0.842323		11.0541	1.96212
664	Flavonoid/flavone		43.73																				0.145075	0	0.441938	0.334731			0.186042	0		0.22472	0.0899367	0.641893	0.552307				0.222917	0
665	TT		43.836																				0.10903	0															0.242226	0
666	Terpenoid		43.922								1.00927	0.7847																								1.73601	1.26819
667	Acid/ester		43.923						6.12459	1.26303
668	Aliphatic compound		43.93																																				0.323323	0.105173
669	Unknown		43.95																															0.151763	0.0718665
670	Acid/ester		44.076						7.49393	3.83391
671	Flavonoid/flavone		44.115								0.176159	0			0.0532025	0							0.161911	0	0.679379	0			0.269943	0				0.538107	0.260027				0.270505	0.0634153
672	Alcohol/aldehyde/ketone		44.117						0.93553	0									0.0400291	0.0149501																			0.20167	0.0347525
673	Flavonoid/flavone		44.129												0.328082	0.313297											0.199384	0.0963393											0.368156	0.0349225
674	Flavonoid/flavone		44.294						2.28571	0.357907													0.460185	0					0.427377	0
675	Flavonoid/flavone		44.295																										0.178113	0		0.344018	0
676	Unknown		44.322																																				0.319622	0.157696
677	Aliphatic compound		44.538																																				0.202356	0.0540458
678	Acid/ester		44.601								0.454622	0.168025																								0.534006	0.443377
679	Aliphatic compound		44.641																													0.474529	0.235305						0.128457	0.0349721
680	Phenolic acid/ester		44.714								0.101418	0															0.127524	0											0.212654	0.0411316
681	Unknown		44.714						0.610385	0.24678
682	Flavonoid/flavone		44.793						1.05759	0.803185											0.844812	0	0.130174	0								0.411865	0.215401	0.100755	0
683	Acid/ester		44.796												0.189786	0			0.844812	0			0.0495663	0			0.199089	0.0697156
684	TT		44.89																						0.135274	0						0.313151	0.0778615
685	Phenylpropanoid		44.917																		0.162536	0.21658																	0.228451	0.0544608
686	Aliphatic compound	Triacontane	44.941	3000									0.0718937	0.0208111	0.151698	0.054262			0.162536	0.21658	0.260782	0.34789										0.51054	0.405502	0.161258	0	0.0727454	0		0.482488	0.135693
687	Aliphatic compound		45.007																0.260782	0.34789																			0.278448	0.166332
688	Alcohol/aldehyde/ketone		45.061										0.243368	0.142981	0.202822	0.13175							0.124023	0			0.221621	0.118947	0.141359	0.048283									0.210634	0.123088
689	Acid/ester		45.123						6.69097	0.499771			0.101356	0	0.279293	0.2211											0.262441	0.164312						0.0987833	0				0.325168	0
690	Terpenoid		45.132								0.45538	0.199987									1.05848	0.571235										0.225508	0			0.262723	0.0491471
691	Alcohol/aldehyde/ketone		45.453						0.463971	0.109715			0.115179	0.0382948	0.0507863	0			1.05848	0.571235			0.0691187	0	0.24065	0.180771
692	Phenole		45.453								1.06512	0.602435																								1.62431	0.238387
693	Acid/ester		45.487										0.0853374	0											0.0506912	0	0.0515127	0
694	Aliphatic compound		45.497																																				0.236884	0.063104
695	Phenole		45.576								0.44335	0.205721																								0.213676	0.0466191
696	Aliphatic compound		45.61																																				0.175216	0.027965
697	Unknown		45.746						1.46219	0.408619
698	Unknown		45.778										0.124249	0.0142604	0.194644	0.12473																0.335722	0						0.186009	0.0201601
699	Aliphatic compound		45.862																								0.427369	0.155716	0.249672	0.0635376						0.0377609	0		2.30284	1.37364
700	Phenole		45.871								0.104432	0																								0.158018	0.0722757
701	Unknown		45.925								0.19848	0.00870075
702	Unknown		45.959																						0.253461	0.142242	0.420847	0						0.63436	0.515407
703	Unknown		45.969						0.427094	0.194935
704	Unknown		45.97						0.31474	0																										0.377104	0
705	Aliphatic compound		46.015																																				3.10411	0.625168
706	Aliphatic compound		46.069																										0.369922	0				0.101615	0	0.0514121	0		3.22339	0.159921
707	Unknown		46.07										0.10038	0.0125415	0.259279	0							0.106681	0					0.101586	0.0380974
708	TT		46.091										0.164089	0	0.211135	0					0.250807	0.275468					0.0779732	0				0.331419	0.212864
709	Aliphatic compound	Untriacontane	46.232	3100							0.181785	0.0405788	0.79697	0.360129	1.04487	0.856921			0.250807	0.275468	0.053484	0.0260538					0.401735	0.471491	0.88318	0.24637				0.746674	0	0.256711	0.0636378		7.44183	1.31961
710	Alcohol/aldehyde/ketone		46.285						0.532975	0.30305									0.053484	0.0260538									0.225026	0.0581847	0.272324
711	Unknown		46.328										0.145641	0	0.453214	0.0621672
712	Acid/ester		46.369								0.384522	0.0626773																								0.18679	0.0490704
713	TT		46.47																						0.395792	0.274484								0.770317	0.71771				0.263427	0.0465917
714	Phenole		46.497								0.479953	0.0403034																								0.121216	0
715	Unknown		46.64						0.778191	0.454861
716	Phenylpropanoid		46.702																						0.0866092	0								0.786032	1.399				0.179615	0.0281377
717	Acid/ester		46.725						0.442353	0.188039
718	TT		46.759								0.191891	0
719	Unknown		46.847						0.428263	0			0.0793965	0									0.173393	0										0.169119	0
720	TT		46.963																						0.43616	0								0.537577	0.571065				0.180976	0
721	Unknown		47.052								0.240149	0																								0.144168	0.013435
722	Aliphatic compound		47.145																																				0.188777	0.0429193
723	Aliphatic compound		47.158																																				0.200986	0.109599
724	Acid/ester		47.22								0.956331	0.378313																								0.822306	0.480022
725	Phenolic acid/ester		47.272										0.252252	0.127574													0.35818	0.178916						0.100786	0
726	Terpenoid		47.287																																	0.185792	0.065481
727	TT		47.357																													0.5209	0	0.211841	0.0673471
728	Phenole		47.432																																	0.247568	0.10391
729	Aliphatic compound	Dotriacontane	47.434	3200																	2.39445	0.792235										0.621583	0.229669						0.179705	0.0581453
730	Phenolic acid/ester		47.471								0.486807	0.177658	0.15256	0	0.506491	0			2.39445	0.792235							0.208543	0.040851				0.463208	0.123652			0.110782	0		0.39136	0.367899
731	Alcohol/aldehyde/ketone		47.531
732	Acid/ester		47.638										0.127896	0.0864802	0.177074	0.0830004							0.0618592	0										0.265255	0
733	Unknown		47.741						1.69671	1.15134			0.19311	0	1.0254	0							0.0907132	0	1.37721	0.250368			0.171086	0.0235447				0.31235	0.196543				0.319784	0.25613
734	Unknown		47.796								0.222142	0.0589952
735	Unknown		47.802										0.140124	0.0310548
736	Unknown		48.026																																				0.164579	0.0140222
737	Alcohol/aldehyde/ketone		48.046								0.207671	0.0476232	0.0495627	0	0.0487588	0			0.0243565	0.00669029									0.193356	0
738	Unknown		48.052										0.0573867	0	0.101888	0													0.130848	0.00226295
739	Unknown		48.053																0.0190129	0.000757286									0.108144	0.0278491
740	Aliphatic compound		48.102																										0.16512	0		0.106269	0						0.595506	0.139285
741	TT		48.148
742	Unknown		48.198																																				0.192828	0.0596466
743	TT		48.244												0.0965762	0													0.132553	0
744	TT		48.254																				0.118745	0
745	Acid/ester		48.259						2.18067	0.304273																			0.14101	0				0.153198	0
746	Acid/ester		48.375												0.647395	0					0.345272	0	0.071996	0								0.315809	0.341977
747	Aliphatic compound		48.454																0.345272	0							0.559247	0.511108	0.650068	0.383816				0.197195	0	0.380711	0.151283		0.784626	0.168227
748	Aliphatic compound		48.506																																				8.31439	1.28716
749	Aliphatic compound		48.506																																				0.720235	0.125499
750	TT		48.551																				0.946341	0.368558
751	TT		48.561						0.55321	0.150171													0.326844	0
752	TT		48.592								0.172234	0
753	Aliphatic compound	Tritriacontane	48.698	3300									0.116057	0.0090944									0.416775	0															1.09066	0.344698
754	Acid/ester		48.744								0.272525	0.0713356	0.0899747	0.0293435	0.117758	0.0390495							0.866071	0.129555			0.209805	0.0957759	0.299768	0.0339989
755	Unknown		48.753										0.123184	0	0.0768118	0													0.246744	0
756	TT		48.753								0.182808	0																								0.688324	0.252031
757	TT		48.761								0.484505	0.29015																								0.453316	0.020962
758	Unknown		48.768																																				0.382201	0.0837249
759	TT		48.865								0.525351	0.162474																								1.14356	0.197438
760	TT		48.934																				0.459521	0.0612583
761	Aliphatic compound		49.006																																				0.254287	0.0875047
762	Phenole		49.015																				0.185215	0.123938
763	TT		49.015								0.519284	0.295154																								0.319772	0.0571499
764	TT		49.094						0.110671	0													0.225942	0
765	TT		49.163								0.193251	0.0105766
766	TT		49.239						0.253515	0.0106395													0.122293	0
767	Aliphatic compound		49.328																													0.180154	0						0.274683	0.168218
768	TT		49.419
769	Acid/ester		49.422		0.10332	0																														0.221703	0
770	TT		49.496								0.326848	0.173894																								0.208805	0.0500532
771	Unknown		49.612								0.262099	0.0920458																								0.223976	0
772	TT		49.632								0.183667	0.0440176																								0.177575	0.0527362
773	TT		49.642																													0.439018	0						0.229694	0.105083
774	TT		49.705
775	Unknown		49.711								0.355505	0.182155																								0.162733	0.0465952
776	Acid/ester		49.784								0.308163	0.13626																								0.315657	0.0335822
777	TT		50.012																		0.338359	0							0.372288	0		0.0652431	0.00335919
778	Phenolic acid/ester		50.034								0.968335	0.351204			0.217209	0			0.338359	0																0.274806	0.1091		0.132375	0.0288554
779	TT		50.229								0.41076	0.114522																								0.268	0.0727952		0.105765	0.00991201
780	Acid/ester		50.269						0.171402	0					0.397102	0																							0.195163	0
781	Unknown		50.36																				0.0447136	0	0.212393	0													0.161232	0
782	TT		50.443								2.09557	1.03914																								1.30714	0.0675798
783	TT		50.58																				0.778047	0
784	Aliphatic compound		50.716																																				0.212004	0.0652983
785	TT		50.732								6.44199	1.31637																								7.82419	2.81837
786	Phenole		50.857						0.113977	0													0.274881	0
787	TT		50.879						0.206798	0.0232456
788	TT		50.925																				0.184282	0
789	TT		50.956								0.57625	0.0782027
790	Unknown		50.971						0.179118	0.0562879
791	Aliphatic compound		51.031																																				0.19145	0.0263719
792	TT		51.067								0.392886	0
793	Aliphatic compound		51.122																																				0.181703	0.0423442
794	TT		51.259								0.765711	0.0664452																								0.923002	0.0811845
795	TT		51.327						0.615909	0.311159													8.13126	0
796	Unknown		51.451						0.257608	0	14.307	5.99011											1.72267	0.853934												13.0193	12.3232		0.361171	0.0995225
797	Aliphatic compound		51.663																																				0.168453	0.0594509
798	Acid/ester		51.749								0.93225	0			0.296252	0							2.64974	1.6963
799	TT		51.785						0.499448	0.046616
800	Unknown		51.923								1.45974	0.138172																								0.673315	0
801	TT		51.977						2.48482	0.257524	3.44774	1.55734											40.8336	17.7508												1.05434	0.611751		0.228747	0.0954342
802	TT		52.061																				3.18844	2.19519
803	Unknown		52.074						0.897716	0.465924
804	Acid/ester		52.084								2.32913	1.76367																				0.0732675	0			0.803835	0.358049
805	TT		52.244								7.46252	2.55015																								6.30845	2.58287		0.14633	0
806	TT		52.41						1.09649	0.373396	0.490743	0											2.74949	0.786733												1.08598	0.0265373
807	TT		52.461								1.33515	0.131904																								1.67231	0.528725
808	TT		52.511																				2.97015	0
809	TT		52.537																				1.47967	0
810	TT		52.602								2.08765	0.19245																								2.45247	0.0669532
811	Unknown		52.604						0.675538	0.356065
812	TT		52.735								1.80711	0.509305																								1.27279	0.0325495
813	TT		53.319																				1.70596	0												0.0895715	0
814	TT		53.433																																	1.38088	0
815	Acid/ester		53.451								2.41655	0.242945																								1.95064	0
816	Phenolic acid/ester		53.57								0.741085	0.283274																								0.497058	0.253675
817	Aliphatic compound		53.84																																				0.15655	0
818	TT		53.846								1.97497	0.904626											1.05654	0
819	TT		53.87								1.07039	0																								1.87704	0.249344
820	TT		53.976																																	1.09324	0.0149353
821	Acid/ester		54.055								2.35379	0.307861																								0.883502	0
822	TT		54.195																				0.932028	0
823	Terpenoid		54.21								1.04969	0.391612																								0.759009	0.183705
824	Unknown		54.375										2.0382	0											0.298037	0													0.432487	0.220485
825	TT		54.436								2.27443	0.0644011																								0.907421	0
826	Unknown		54.726								0.541473	0
827	TT		54.797						3.85474	1.83591													14.8146	0															0.263091	0
828	Acid/ester		54.954						3.77145	3.04865
829	TT		55.028								5.23126	2.20944																								5.35789	2.39767
830	Terpenoid		55.1																				1.18773	0
831	TT		55.304																				0.866442	0
832	TT		55.424						0.218552	0													0.844673	0
833	TT		55.53								0.425067	0
834	TT		55.629								0.397732	0.0746505																								0.25027	0
835	Unknown		55.875								0.249389	0.0768177											1.62346	0
836	Unknown		56.012																				1.0132	0												0.758985	0
837	Unknown		56.062								2.05204	1.34013																				0.165057	0.102469			1.30078	0
838	Acid/ester		56.175																										0.28709	0
839	TT		56.603						0.447409	0.319974													1.33002	0
840	TT		56.694						1.35921	0.820927
841	TT		56.81								0.376291	0.0181558											0.953388	0												0.116298	0
842	TT		57.287								1.53194	0																								2.03655	1.73909
843	TT		57.31								3.53666	2.66393																								2.2557	0
844	TT		57.751								0.513137	0.0602151																								0.388767	0
845	Unknown		58.012								0.281676	0.061405																								0.851103	0
846	Unknown		58.047																										0.420171	0
Individual components, that have been identified according to their retention time (RT) and Kovats retention index (KI), are listed. Columns represent the mean values (%) and standard deviation of relative amounts detected for a compound in all samples of a specific tree species, bee-collected resin type or of propolis. Tree species: Pb, Populus balsamifera; Pt, Populus tremula; Px1-Px3, three un…
